# Supplementary material for: Metabolizable lanthanum-coordination nanoparticles as efficient radiosensitizers for solid tumor therapy
Source: Royal Society of Chemistry journal article supplement (doi:10.1039/c7tb01054k), 2017-01-01
Supplement: c7tb01054k1.pdf [file c7tb01054k1.pdf]

## **Supporting Information for**

# **Metabolizable Lanthanum-Coordination Nanoparticles as Efficient Radiosensitizers for Solid Tumor Therapy**

Tianbo Yang, Yuan Liang, Jiazi Hou, Yanli Dou, Wanxi Zhang \*

College of Materials Science and Engineering, Jilin University, Changchun, China

\* Corresponding author

E-mail:

wxzhangjlu@sina.com

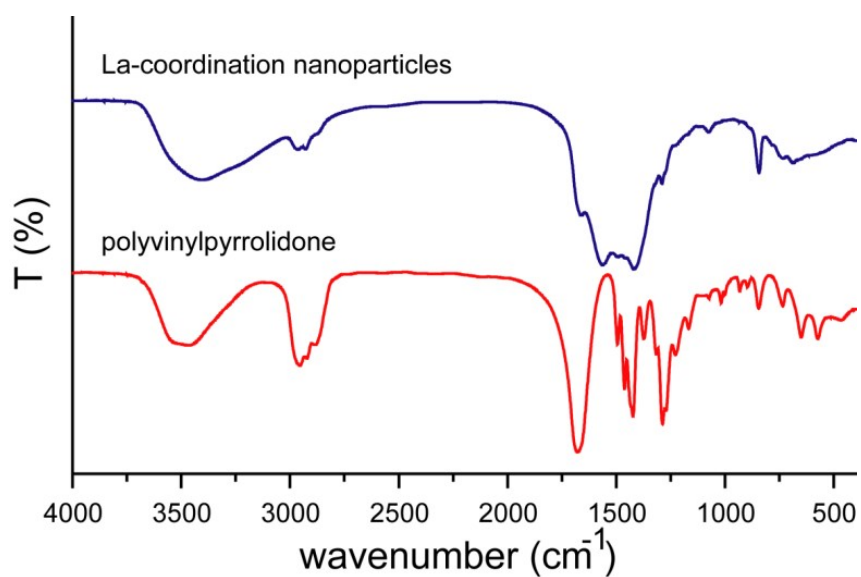

**Fig. S1.** FT-IR spectra of polyvinylpyrrolidone and lanthanum-coordination nanoparticles.

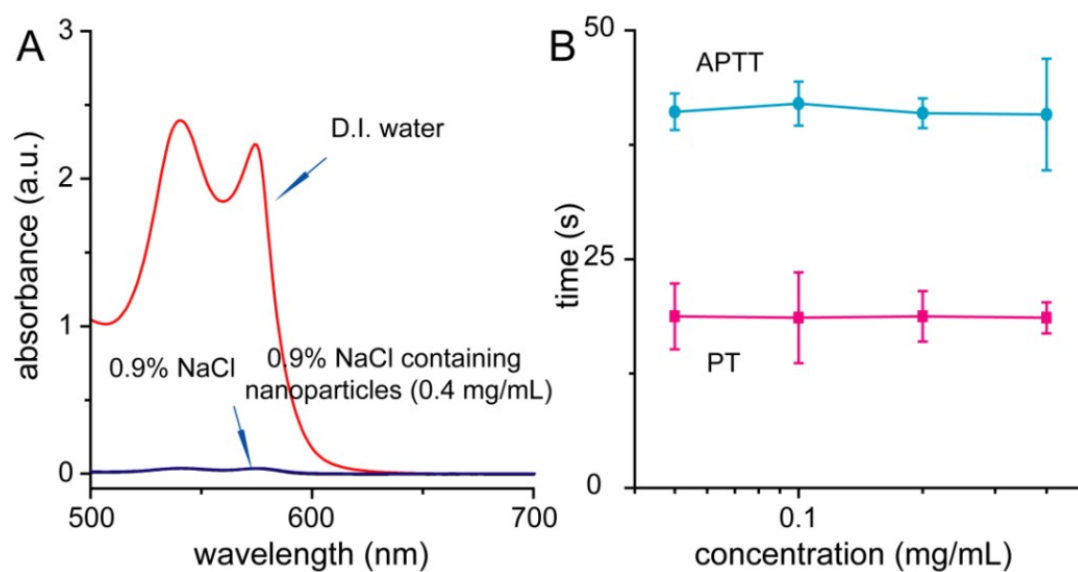

**Fig. S2.** UV-vis absorption spectra of hemoglobin (A) and blood coagulation results (B) in the presence of lanthanum-coordination nanoparticles with different concentrations.

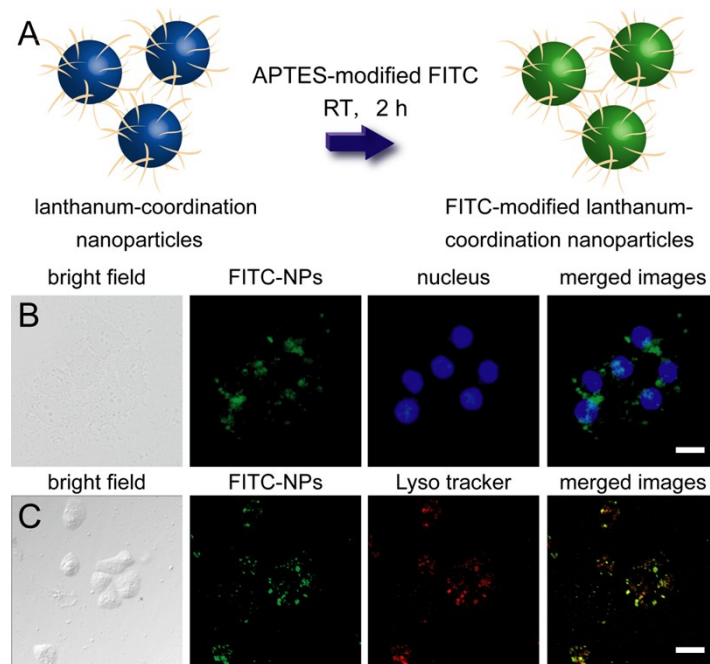

**Fig. S3.** Schematic illustration of the synthesis of fluorescent lanthanum-coordination nanoparticles (A) and fluorescence microscope images of 4T1 cells incubated with FITC-modified nanoparticles for 6 h at 37°C (B and C). The scale bar is 20  $\mu\text{m}$ .

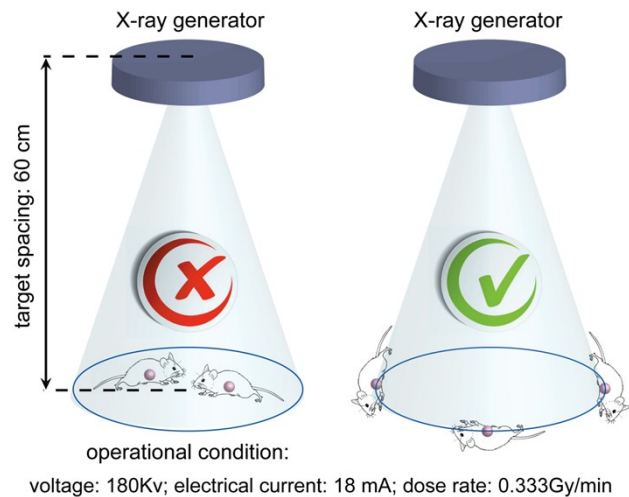

**Fig. S4.** Schematic illustration of X-ray radiation condition and related operation parameters in our present study. To minimize the whole body systemic toxicity of mice induced by X-ray radiation, tumor bearing mice were fixed around the area of X-ray exposure and tumors were directly exposed to X-ray radiation only.

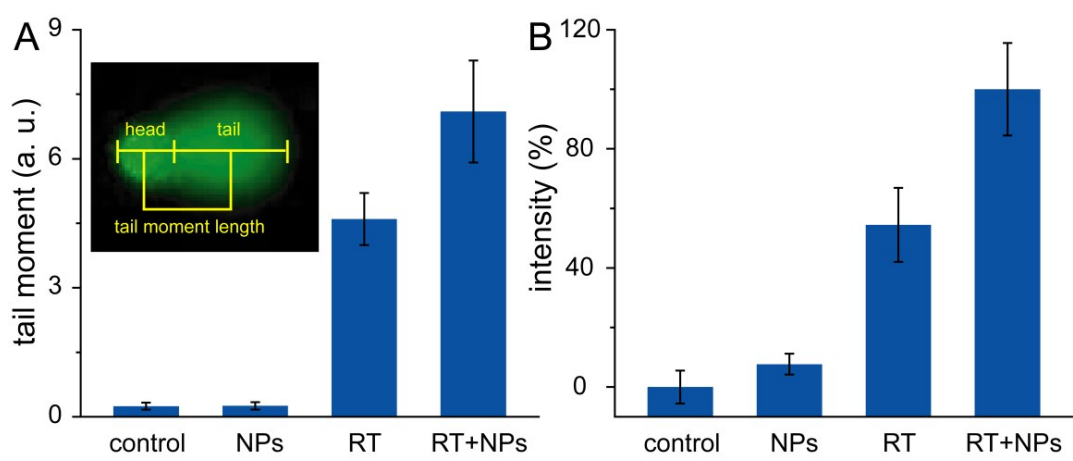

**Fig. S5.** Tail moment analysis of 4T1 cells after different treatments (A). Quantitative intracellular ROS levels after different treatments via flow cytometry analysis (B). Inset of A: definition of tail moment length.

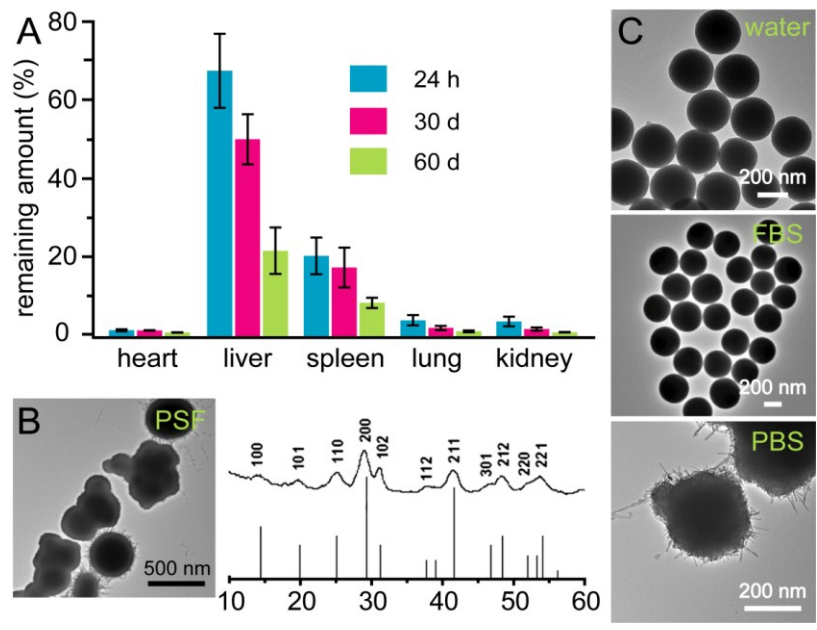

**Fig. S6.** Time-dependent bio-distribution of lanthanum-coordination nanoparticles after intravenous injection (A). Typical characterization of lanthanum-coordination nanoparticles 30 d after continuous phagolysosomal simulated fluid (PSF) exposure (B). TEM images of lanthanum-coordination nanoparticles 7 d after continuous water, fetal bovine serum (FBS), and phosphate buffer saline (PBS) exposure (C).

**Table S1.** Leakage percentages of LDH from 4T1 cells after co-incubation with lanthanum-coordination nanoparticles.

| Concentrations (mg/mL) | Leakage percentages of LDH (%) |
|------------------------|--------------------------------|
| 0                      | 4.95                           |
| 0.0125                 | 10                             |
| 0.025                  | 5.85                           |
| 0.05                   | 9.65                           |
| 0.1                    | 10.7                           |
| 0.2                    | 9.95                           |
| 0.4                    | 8.35                           |

**Table S2.** Values of hemolysis percentage of lanthanum-coordination nanoparticles.

| Concentrations (mg/mL) | Value of hemolysis (%) |
|------------------------|------------------------|
| 0.9% NaCl solution     | 0                      |
| water                  | 100                    |
| 0.0125                 | -0.085                 |
| 0.025                  | 0.44                   |
| 0.05                   | 0.165                  |
| 0.1                    | 0.21                   |
| 0.2                    | 0.11                   |
| 0.4                    | 0.195                  |
